# Supplementary material for: Imputation of sequence level genotypes in the Franches-Montagnes horse breed
Source: Genet Sel Evol. 2014 Oct 1;46(1):63. doi: 10.1186/s12711-014-0063-7 (PMC4180851; doi:10.1186/s12711-014-0063-7)
Supplement: Additional file 1. — Summary statistics of next-generation sequencing. In this file, some basic summary statistics of NGS and genotype concordance with the SNP-chip data per horse are provided. [file 12711_2014_63_MOESM1_ESM.xlsx]

## Sheet: Sheet1
Horse	Reads Sequenced	Mapped Reads	% of mapped reads	Coverage	Uniquely mapping reads	% of Uniquely mapped reads	Genotype Concordance
1	66,582,389	62,588,853	94	2.66	60,966,372	91.57	84.7
2	291,531,795	271,778,326	93.22	4.66	263,846,423	90.5	91.49
3	234,536,171	209,030,737	89.13	8.75	204,062,157	87.01	97.37
4	266,567,970	252,372,449	94.67	10.72	245,376,259	92.05	98.2
5	237,529,484	221,194,197	93.12	9.39	214,262,843	90.2	98.22
6	282,978,686	251,810,694	88.99	10.65	244,785,927	86.5	98.54
7	263,409,962	233,046,031	88.47	9.85	226,090,313	85.83	98.6
8	327,510,870	290,716,054	88.77	12.29	282,682,988	86.31	99
9	328,811,994	311,415,890	94.71	13.23	302,573,554	92.02	99.07
10	362,741,520	340,801,272	93.95	13.91	332,366,027	91.63	99.15
11	364,296,303	339,091,671	93.08	14.41	329,862,841	90.55	99.16
12	380,034,595	355,478,329	93.54	15.1	345,445,946	90.9	99.33
13	395,051,255	370,029,656	93.67	15.1	359,276,031	90.94	99.38
14	407,035,336	381,492,118	93.72	16.19	372,613,270	91.54	99.43
15	505,207,457	476,511,580	94.32	20.23	463,404,318	91.73	99.43
16	367,484,187	324,276,739	88.24	13.71	314,427,148	85.56	99.43
17	405,551,953	378,934,908	93.44	16.1	368,030,019	90.75	99.47
18	400,677,225	379,605,184	94.74	16.14	369,120,594	92.12	99.47
19	397,644,900	374,158,357	94.09	15.9	362,196,019	91.09	99.49
20	444,969,144	416,589,262	93.62	17.68	405,160,774	91.05	99.49
21	426,499,352	402,812,111	94.45	17.12	390,695,748	91.61	99.5
22	411,107,097	389,646,938	94.78	16.57	378,871,140	92.16	99.5
23	410,304,864	384,834,104	93.79	16.34	373,458,351	91.02	99.5
24	454,293,674	432,795,524	95.27	18.41	424,636,501	93.47	99.57
25	474,882,740	442,106,867	93.1	18.79	428,923,498	90.32	99.63
26	568,567,625	531,756,072	93.53	22.59	517,388,289	91	99.65
27	452,497,662	422,185,196	93.3	17.95	410,689,449	90.76	99.67
28	629,999,864	595,109,610	94.46	25.27	580,442,473	92.13	99.7
29	484,222,185	450,845,484	93.11	19.15	437,191,460	90.29	99.7
30	500,510,275	464,419,445	92.79	19.72	449,807,951	89.87	99.76
