# Supplementary material for: Imputation of sequence level genotypes in the Franches-Montagnes horse breed
Source: Genet Sel Evol. 2014 Oct 1;46(1):63. doi: 10.1186/s12711-014-0063-7 (PMC4180851; doi:10.1186/s12711-014-0063-7)
Supplement: Additional file 2. — Number of SNPs used for imputation. For each chromosome, the number of SNPs and the concordance of imputation are listed in this table. [file 12711_2014_63_MOESM2_ESM.xlsx]

## Sheet: Tabelle1
ECA	#SNPs	Concordance
1	1024482	0.956
2	671639	0.959
3	657374	0.96
4	606392	0.96
5	524310	0.957
6	479217	0.956
7	529677	0.956
8	530119	0.954
9	458606	0.957
10	480231	0.95
11	295714	0.951
12	252568	0.919
13	249525	0.94
14	501129	0.962
15	469731	0.96
16	480122	0.958
17	484157	0.96
18	475807	0.962
19	345475	0.961
20	426931	0.944
21	334867	0.955
22	270185	0.952
23	299663	0.951
24	263732	0.953
25	227693	0.943
26	270961	0.957
27	258616	0.955
28	257526	0.954
29	202984	0.955
30	198188	0.95
31	149966	0.954
X	449493	0.943
